# Supplementary material for: Designing the Hotspots Distribution by Anisotropic Growth
Source: MDPI journal article supplement (doi:10.3390/molecules26010187), 2021-01-02
Supplement: s1 [file s1]

# Designing the hotspots distribution by anisotropic growth

Tianshun Li<sup>1</sup>, Renxian Gao<sup>2</sup>, Xiaolong Zhang<sup>1\*</sup>, Yongjun Zhang<sup>3\*</sup>

<sup>1</sup> Key Laboratory of Functional Materials Physics and Chemistry, Ministry of Education, College of Physics, Jilin Normal University, Changchun 130103, China

<sup>2</sup> Department of Physics, Xiamen University, Xiamen 361005, China

<sup>3</sup> School of Material and Environmental Engineering, Hangzhou Dianzi University, Hangzhou 310012, China; yjzhang@hdu.edu.cn

\* Correspondence: zhangxiaolong@jlnu.edu.cn (X. Zhang), yjzhang@hdu.edu.cn (Y. Zhang)

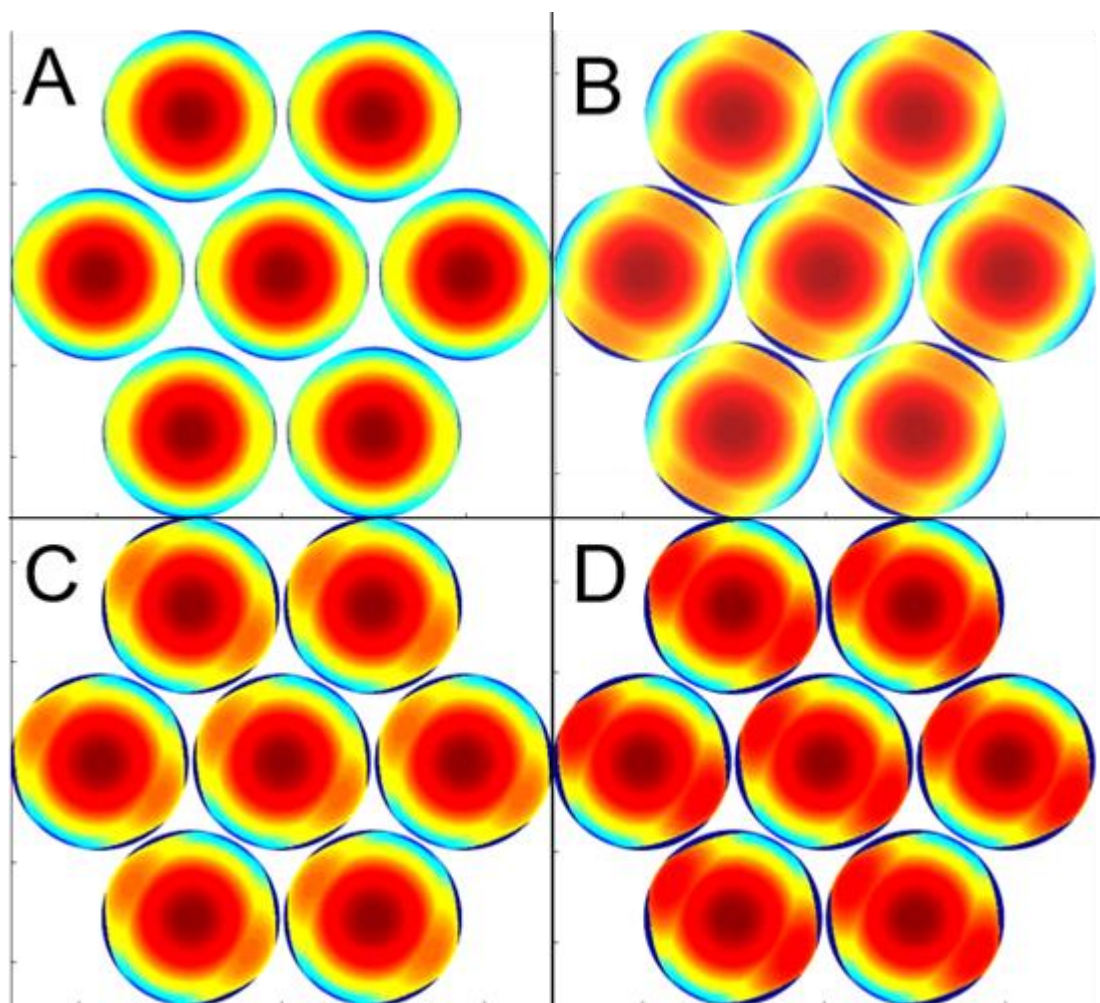

**Figure S1.** The MATLAB simulation of the different shape arrays.

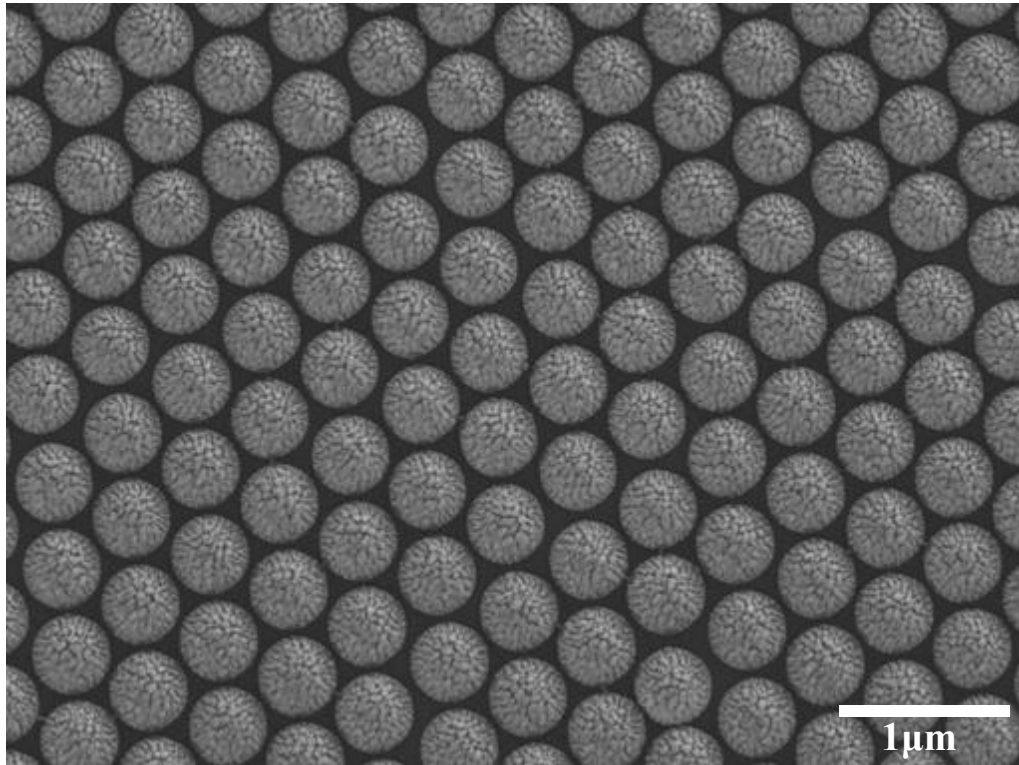

**Figure S2.** SEM images of nanocaps deposited on PS array with OAD angles of 0°

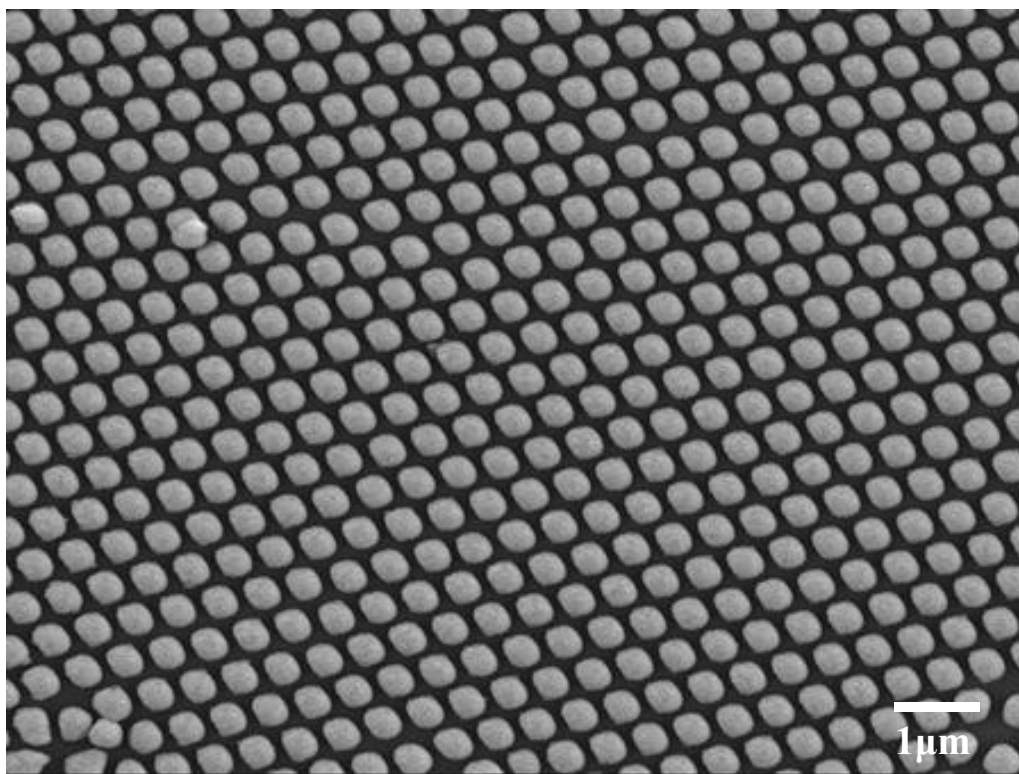

**Figure S3.** The large area of walnut shaped nanostructure.

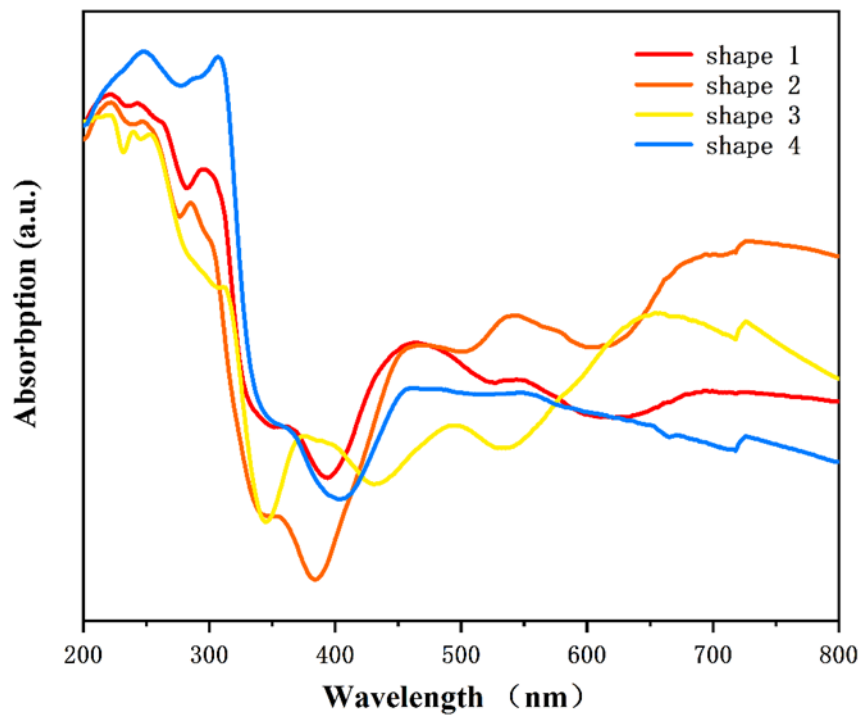

Figure S4. U-V images of different nanocaps.

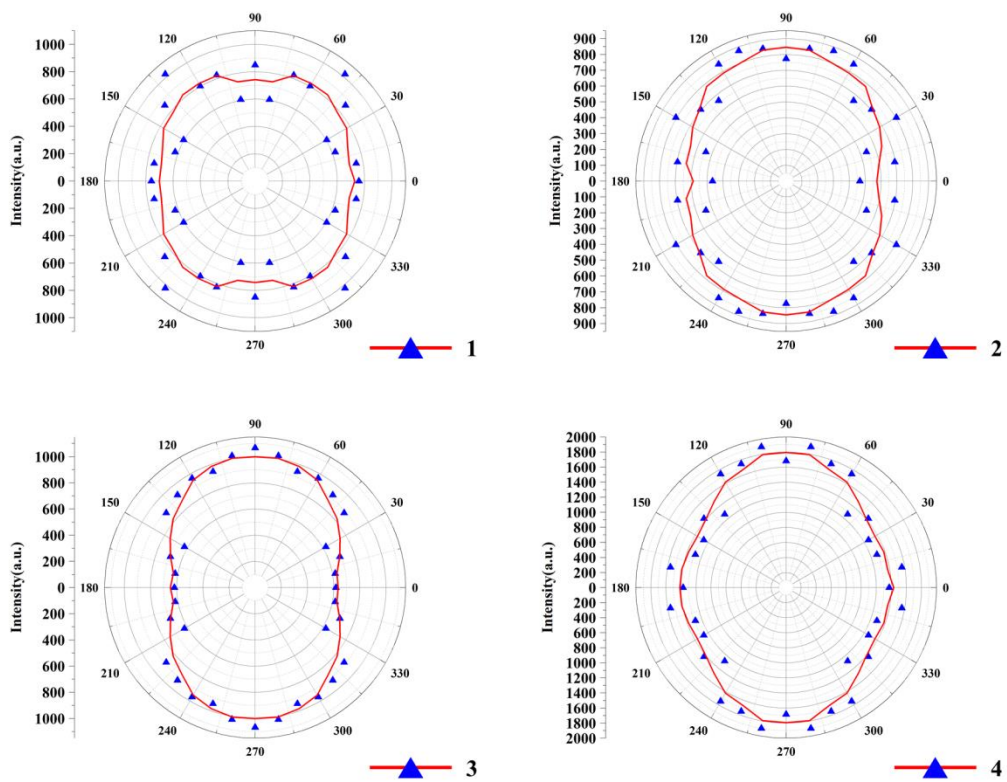

Figure S5. The polar coordinate diagram of corresponding SERS strength changing with the angle of incident excitation light. When the wavelength is the 518  $\text{cm}^{-1}$

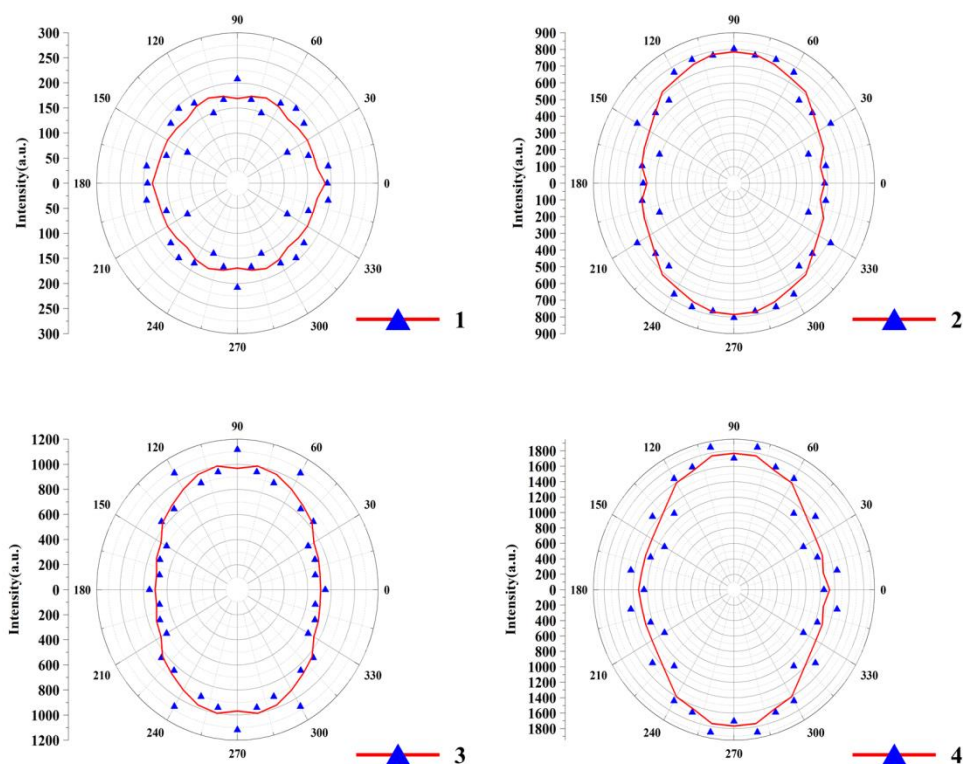

Figure S6. The polar coordinate diagram of corresponding SERS strength changing with the angle of incident excitation light. When the wavelength is the 1075  $\text{cm}^{-1}$
